# Supplementary material for: Quantitative analysis of urea in human urine and serum by1H nuclear magnetic resonance
Source: Royal Society of Chemistry journal article supplement (doi:10.1039/c2an15780b), 2011-12-16
Supplement: c2an15780b.pdf [file c2an15780b.pdf]

# **Quantitative Analysis of Urea in Human Urine and Serum by $^1\text{H}$ Nuclear Magnetic Resonance**

Lingyan Liu<sup>a</sup>, Huaping Mo<sup>b</sup>, Siwei Wei<sup>c</sup>, and Daniel Raftery<sup>c\*</sup>

<sup>a</sup>Weldon School of Biomedical Engineering, Purdue University, 206 S. Martin Jischke Dr.,  
West Lafayette, IN 47907

<sup>b</sup>Purdue Interdepartmental NMR Facility, Purdue University, West Lafayette, IN 47907

<sup>c</sup>Department of Chemistry, Purdue University, 560 Oval Dr., West Lafayette, IN 47907

\*Corresponding author:

Email: [raftery@purdue.edu](mailto:raftery@purdue.edu)

Tel: (765) 494-6070

Fax: (765) 494-0239

## Supplementary Information

**Table S1:** Preparation and composition information for the set of urea aqueous solutions.

| sample label | urea stock solution weight (mg) | 4 M PBS buffer (ml) | D <sub>2</sub> O (ml) |
|--------------|---------------------------------|---------------------|-----------------------|
| 1*           | 49.4                            | 2.50                | 0.50                  |
| 2*           | 251.8                           | 2.50                | 0.50                  |
| 3*           | 488.3                           | 2.50                | 0.50                  |
| 4*           | 994.8                           | 2.50                | 0.50                  |
| 5*           | 2484.5                          | 2.50                | 0.50                  |
| 6*           | 4895.7                          | 2.50                | 0.50                  |
| 7**          | 1011.4                          | 1.25                | 0.25                  |
| 8**          | 2411.5                          | 1.25                | 0.25                  |

\* uses 0.206 M urea as the stock solution, and prepared in a 10.00 ml volumetric flask.

\*\* uses 1.15 M urea as the stock solution, and prepared in 5.00 ml volumetric flask.

**Table S2:** Preparation details for the set of urine standard addition samples.

| urine sample no. | bulk urine weight(g) | stock urea solution weight (g)/volume (ml)* | 5 M PBS buffer (ml) | D <sub>2</sub> O (ml) | total volume (ml)** |
|------------------|----------------------|---------------------------------------------|---------------------|-----------------------|---------------------|
| 1                | 2.4899               | 0                                           | 1.0                 | 0.25                  | 5.00                |
| 2                | 2.4961               | 0.0502                                      | 1.0                 | 0.25                  | 5.00                |
| 3                | 2.4814               | 0.2513                                      | 1.0                 | 0.25                  | 5.00                |
| 4                | 2.4803               | 0.4942                                      | 1.0                 | 0.25                  | 5.00                |
| 5                | 2.4720               | 0.7448                                      | 1.0                 | 0.25                  | 5.00                |
| 6                | 2.5052               | 0.9894                                      | 1.0                 | 0.25                  | 5.00                |

\*uses 2.07M urea as the stock solution, and 1.0304 g/ml as its density.

\*\* H<sub>2</sub>O was added to end sample to make 5.00 ml total volume.

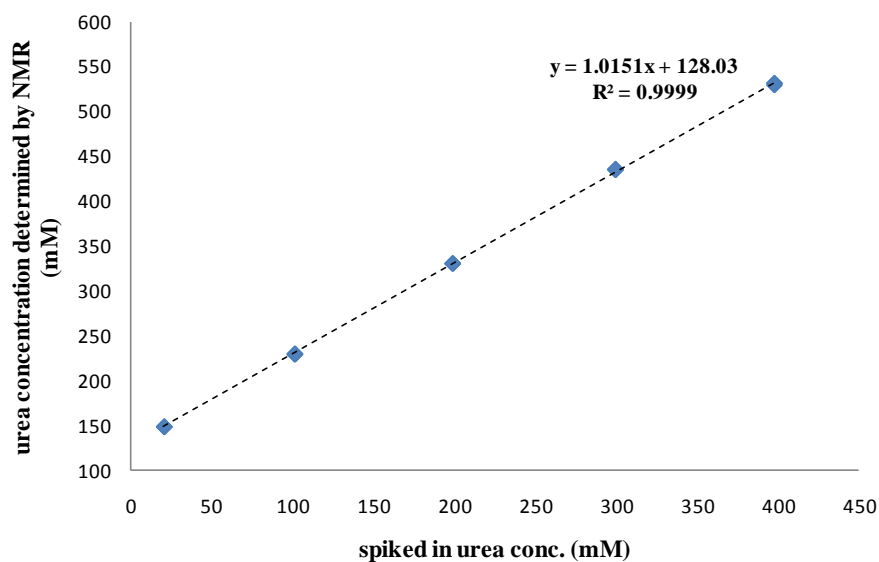

**Figure S1:** Determination of urea concentration in bulk urine by the standard addition method. The dashed line shows the linear trendline across all measurements. The fitted equation and R-squared value are shown.

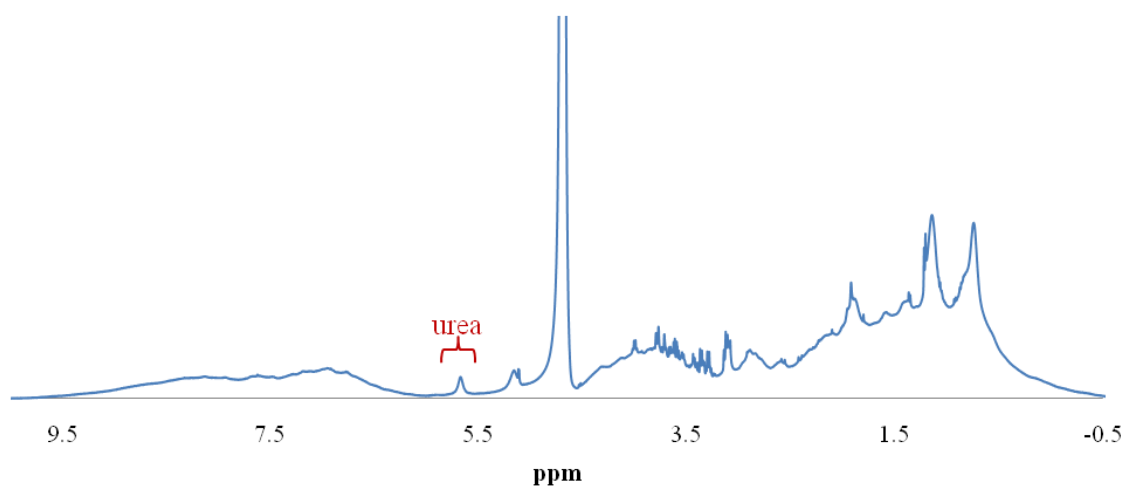

**Figure S2:**  $^1\text{H}$  NMR spectrum of urea in human serum.
